# Supplementary material for: Facile synthesis of CNT interconnected PVP-ZIF-8 derived hierarchically porous Zn/N co-doped carbon frameworks for oxygen reduction
Source: Royal Society of Chemistry journal article supplement (doi:10.1039/d0nr09156a), 2021-01-01
Supplement: d0nr09156a1.pdf [file d0nr09156a1.pdf]

## Supporting Information

### **Facile Synthesis of CNT Interconnected PVP-ZIF-8 Derived Hierarchical Porous Zn/N Co-doped Carbon Frameworks for Oxygen Reduction**

Gourav Singla,<sup>‡</sup><sup>a</sup> Siddheshwar N. Bhange, <sup>‡</sup><sup>ab</sup> Mani Mahajan<sup>c</sup> and Sreekumar Kurungot <sup>\*ab</sup>

<sup>a</sup> Physical and Materials Chemistry Division, CSIR-National Chemical Laboratory, Pune, Maharashtra 411008, India.

<sup>b</sup> Academy of Scientific and Innovative Research (AcSIR), Ghaziabad-201002, India.

<sup>c</sup> Department of Physics and Centre for Energy Science, Indian Institute of Science Education and Research Pune, Pune, 411008, India

Email: k.sreekumar@ncl.res.in

<sup>‡</sup> These authors contributed equally in this work

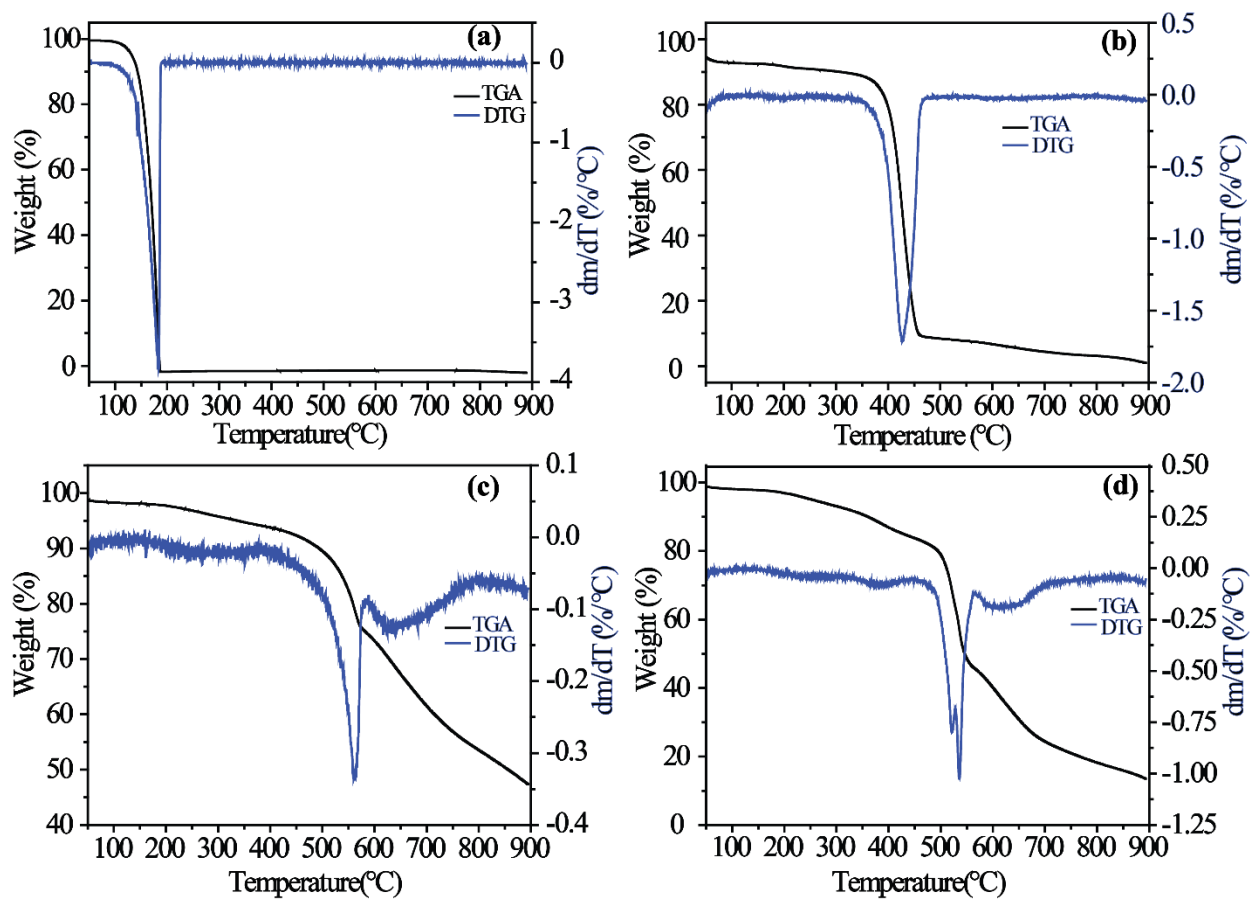

**Fig. S1** TGA and the corresponding derivative TG (DTG) curves of (a) MIM, (b) PVP, (c) ZIF-8@CNT, and (d) PVP-ZIF-8@CNT measured in N<sub>2</sub> atmosphere.

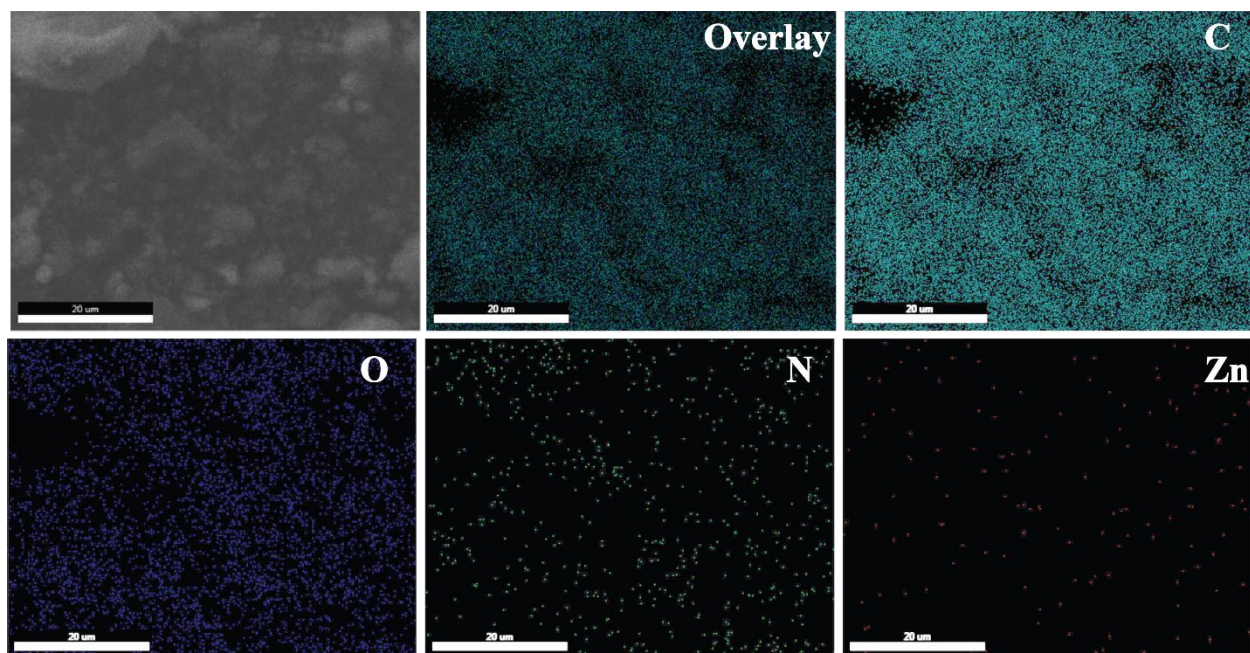

**Fig. S2** Elemental mapping images of C, O, N and Zn of PVP-ZIF-8@CNT-900.

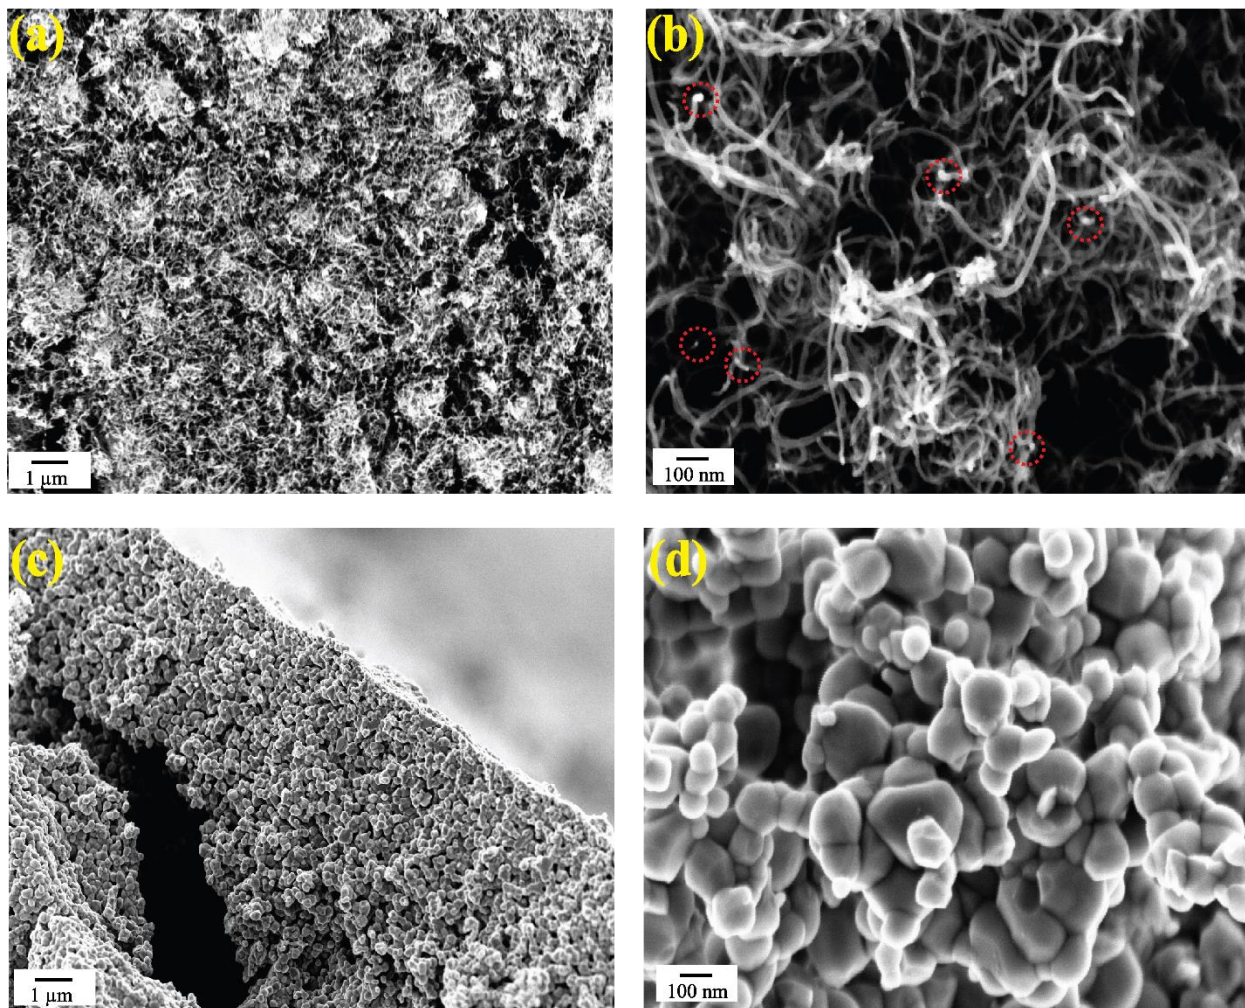

**Fig. S3** SEM images of (a, b) ZIF-8@CNT-900 and (c, d) PVP-ZIF-8-900.

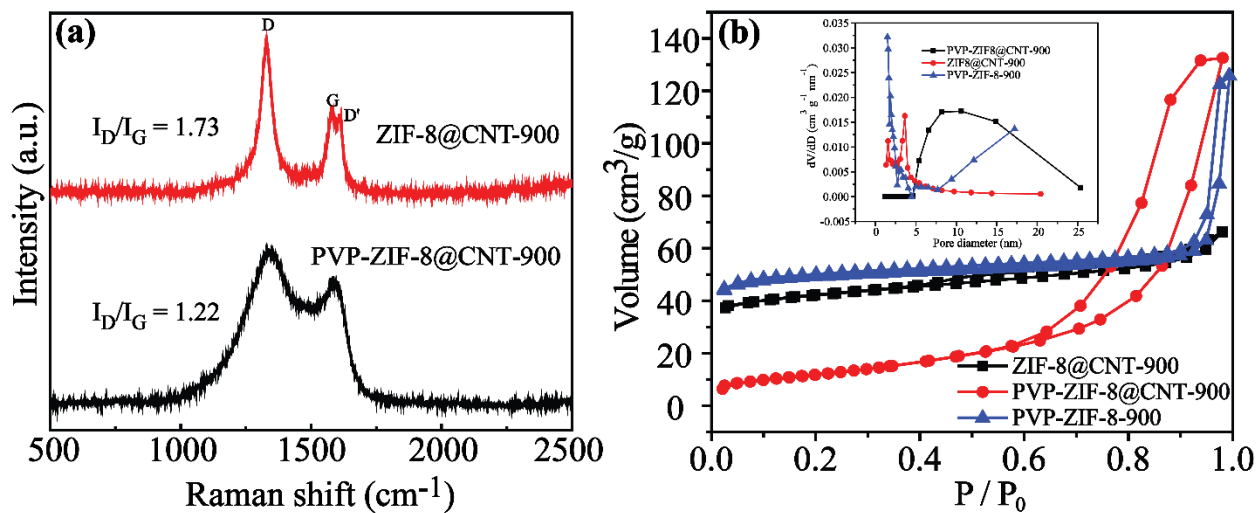

**Fig. S4** (a) Raman spectra and (b) N<sub>2</sub> adsorption/desorption profiles of PVP-ZIF-8@CNT-900, ZIF-8@CNT-900 and PVP-ZIF-8-900 (Inset: BJH pore size distribution curves of PVP-ZIF-8@CNT-900, ZIF-8@CNT-900 and PVP-ZIF-8-900).

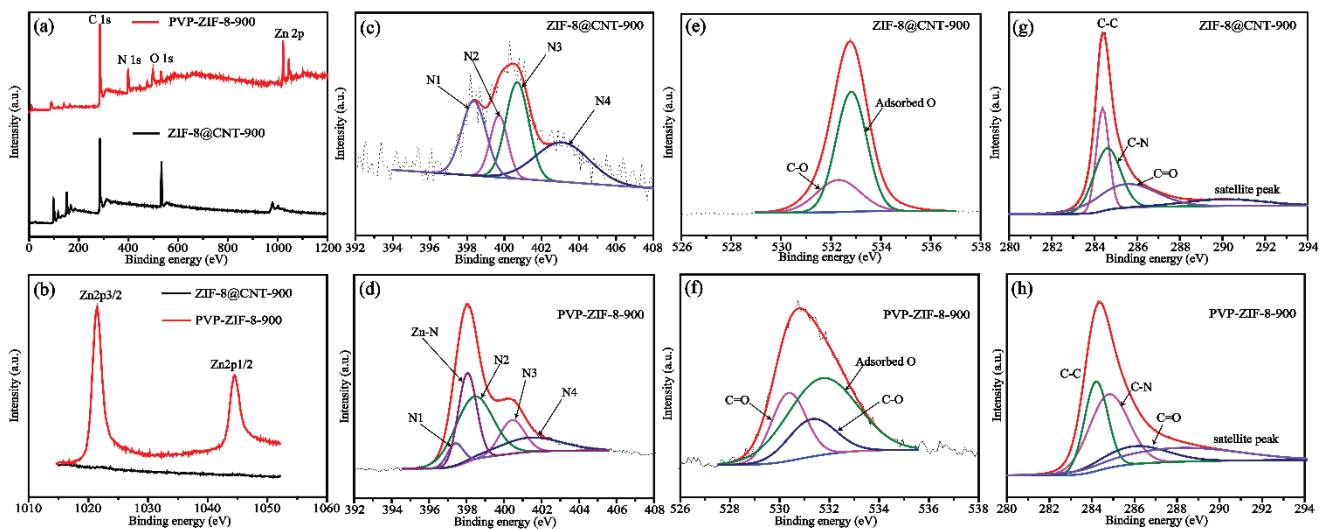

**Fig. S5** (a) XPS survey spectra and (b) XPS spectra of Zn 2p for PVP-ZIF-8-900 and ZIF-8@CNT-900 samples; (c-h) deconvoluted XPS spectra of N 1s, O 1s and C 1s for ZIF-8@CNT-900 and PVP-ZIF-8-900.

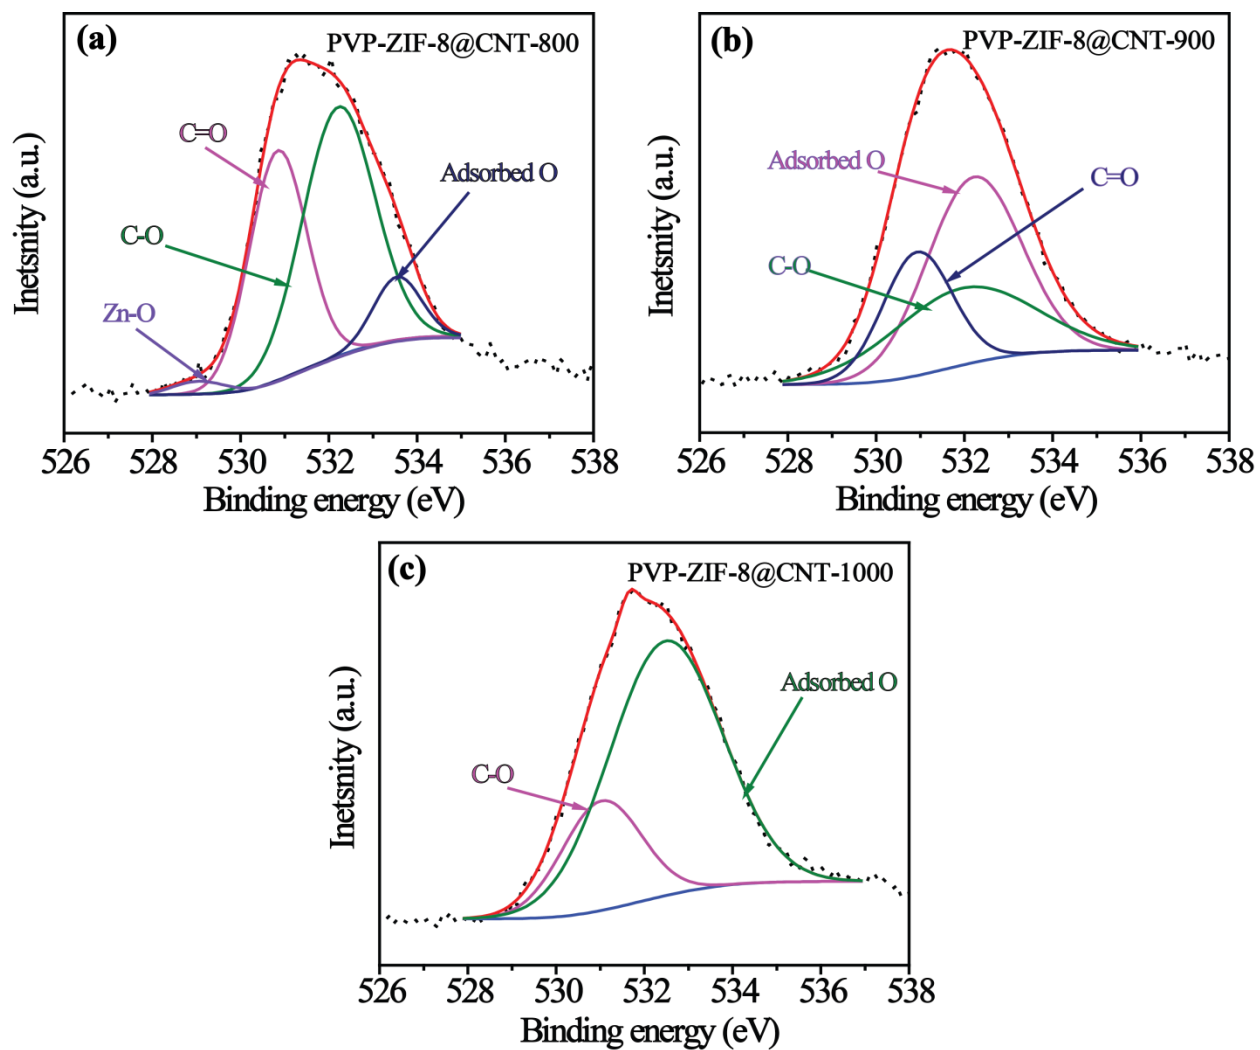

**Fig. S6** XPS high-resolution spectra of O 1s for (a) PVP-ZIF-8@CNT-800, (b) PVP-ZIF-8@CNT-900 and (c) PVP-ZIF-8@CNT-1000.

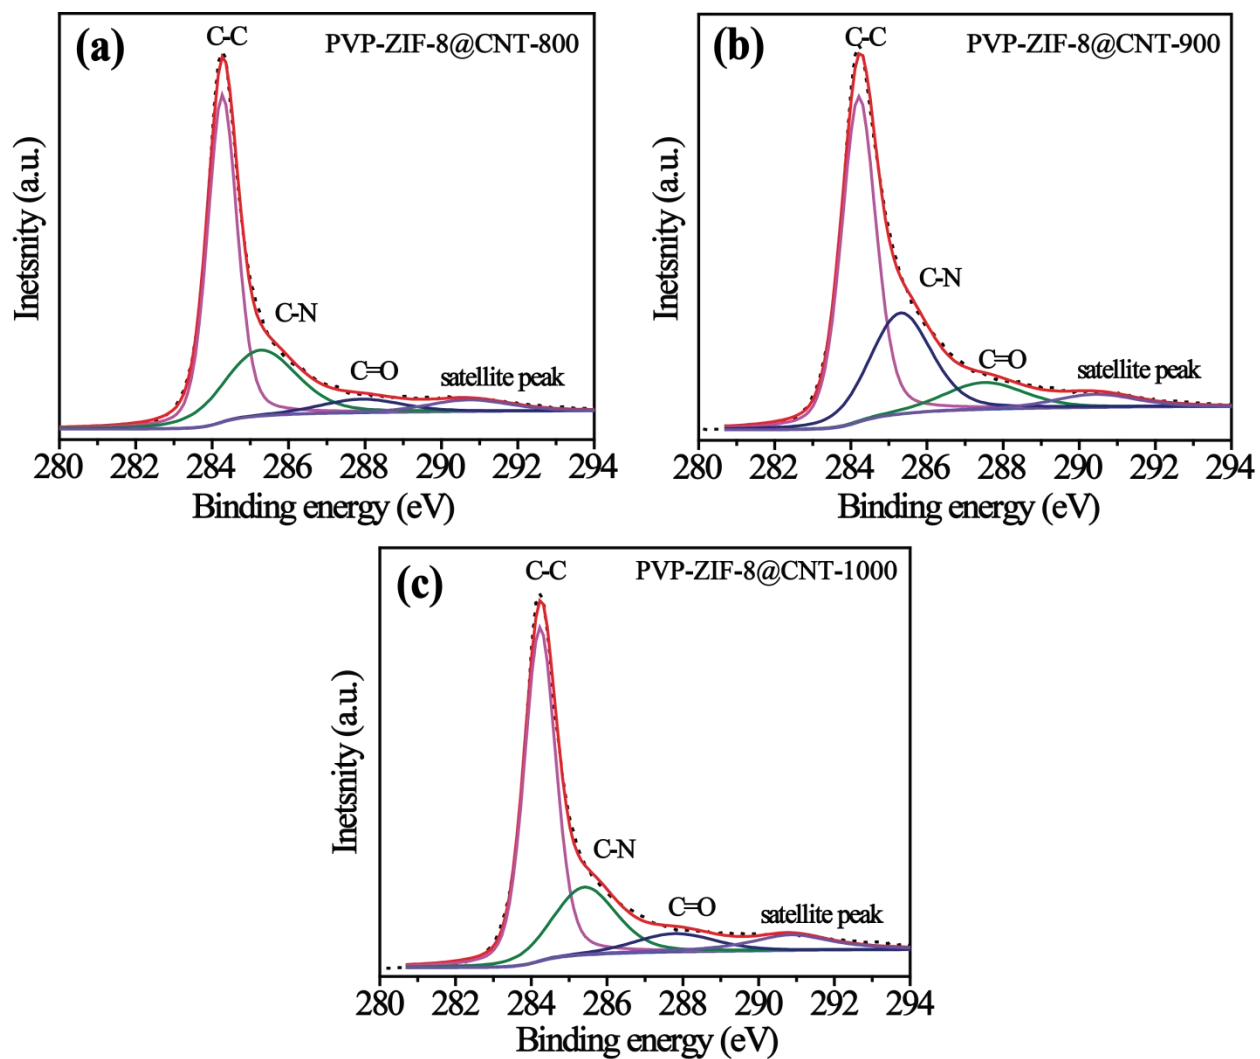

**Fig. S7** XPS high-resolution spectra of C1s for (a) PVP-ZIF-8@CNT-800, (b) PVP-ZIF-8@CNT-900 and (c) PVP-ZIF-8@CNT-1000.



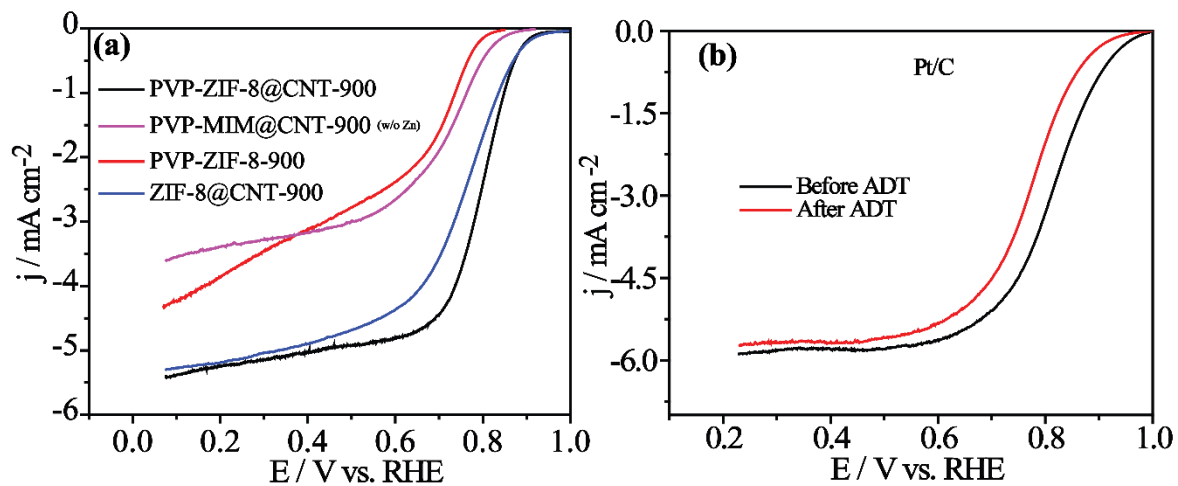

**Fig. S8** (a) LSV profiles of the PVP-ZIF-8@CNT-900, PVP-MIM@CNT-900 (w/o Zn), PVP-ZIF-8-900 and ZIF-8@CNT-900 on a RDE electrode in  $\text{O}_2$ -saturated  $0.1 \text{ M KOH}$  solution at a rotation rate of  $1600 \text{ rpm}$  and a scan rate of  $10 \text{ mV s}^{-1}$ ; (b) the RDE polarization curves of Pt/C in  $\text{O}_2$ -saturated  $0.1 \text{ M KOH}$  solution before ADT and after the 5000 potential cycles with the electrode rotation speed of  $1600 \text{ rpm}$  and scan rate of  $10 \text{ mV s}^{-1}$ .

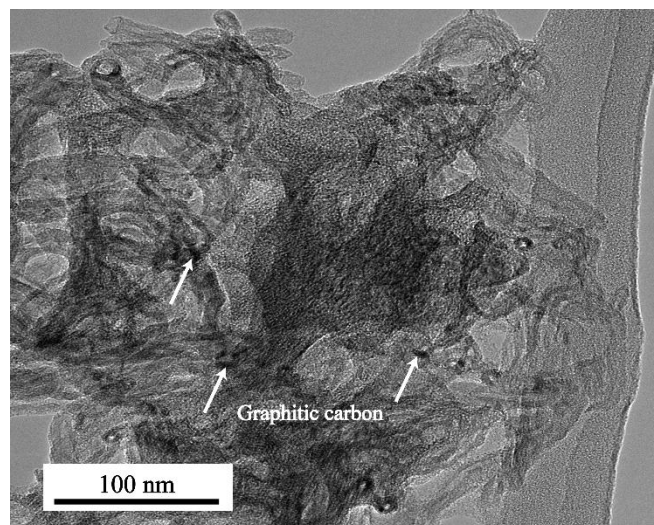

**Fig. S9** TEM image of PVP-ZIF-8@CNT-900 after 5000 ADT cyclings.

**Table S1.** Elemental composition of PVP-ZIF-8@CNT-900, PVP-ZIF-8-900 and ZIF-8@CNT-900.

| Sample                   |        | Zn        | N         | C         | O         |
|--------------------------|--------|-----------|-----------|-----------|-----------|
| <b>PVP-ZIF-8@CNT-900</b> | MP-AES | 4 wt.%    | -         | -         | -         |
|                          | XPS    | 7.3 wt.%  | 8.7 wt.%  | 73.7 wt.% | 10.3 wt.% |
| <b>PVP-ZIF-8-900</b>     | MP-AES | 10 wt.%   | -         | -         | -         |
|                          | XPS    | 16.1 wt.% | 15.8 wt.% | 62.8 wt.% | 5.3 wt.%  |
| <b>ZIF-8@CNT-900</b>     | MP-AES | -         | -         | -         | -         |
|                          | XPS    | -         | 1.8 wt.%  | 75.6 wt.% | 22.6 wt.% |

**Table S2.** Nitrogen content and its types of coordination in PVP-ZIF-8@CNT-800, PVP-ZIF-8@CNT-900, PVP-ZIF-8@CNT-1000, ZIF-8@CNT-900 and PVP-ZIF-8-900.

| Sample                    | Total N<br>[at. %] | Pyridinic<br>N<br>[at.%] | Pyrrolic<br>N<br>[at.%] | Graphitic<br>N<br>[at.%] | Oxidized<br>N<br>[at.%] |
|---------------------------|--------------------|--------------------------|-------------------------|--------------------------|-------------------------|
| <b>PVP-ZIF-8@CNT-800</b>  | 1.54               | 0.11                     | 1.40                    | 0                        | 0.03                    |
| <b>PVP-ZIF-8@CNT-900</b>  | 8.3                | 1.32                     | 3.82                    | 2.95                     | 0.21                    |
| <b>PVP-ZIF-8@CNT-1000</b> | 2.74               | 0.64                     | 0.32                    | 1.44                     | 0.34                    |
| <b>ZIF-8@CNT-900</b>      | 1.51               | 0.39                     | 0.22                    | 0.46                     | 0.44                    |
| <b>PVP-ZIF-8-900</b>      | 15.8               | 1.29                     | 8.42                    | 2.92                     | 3.17                    |

**Table S3.** Oxygen reduction peak potential, onset potential and  $E_{1/2}$  values recorded for all the catalysts in alkaline condition.

| Sample                    | Oxygen reduction<br>peak potential (V)<br>vs. RHE | Onset potential<br>(V) vs. RHE | $E_{1/2}$ (V) vs. RHE |
|---------------------------|---------------------------------------------------|--------------------------------|-----------------------|
| <b>PVP-ZIF-8@CNT-800</b>  | 0.72                                              | 0.88                           | 0.705                 |
| <b>PVP-ZIF-8@CNT-900</b>  | 0.78                                              | 0.96                           | 0.795                 |
| <b>PVP-ZIF-8@CNT-1000</b> | 0.75                                              | 0.93                           | 0.770                 |

**Table S4.** Comparison of the ORR performance of PVP-ZIF-8@CNT-900 with the other reported catalysts in 0.1 M KOH solution.

| Catalyst                                               | Loading (mg cm <sup>-2</sup> ) | E <sub>onset</sub> (V) vs RHE | E <sub>1/2</sub> (V) vs RHE | References        |
|--------------------------------------------------------|--------------------------------|-------------------------------|-----------------------------|-------------------|
| <b>PVP-ZIF-8@CNT-900</b>                               | <b>0.25</b>                    | <b>0.960</b>                  | <b>0.795</b>                | <b>This study</b> |
| <b>Co<sub>3</sub>O<sub>4</sub>@C-MWCNTs</b>            | 0.33                           | 0.890                         | 0.810                       | S1                |
| <b>Co@Co<sub>3</sub>O<sub>4</sub>/NC</b>               | 0.21                           | N/A                           | 0.800                       | S2                |
| <b>N-Co<sub>9</sub>S<sub>8</sub>/G</b>                 | 0.20                           | 0.941                         | 0.770                       | S3                |
| <b>Co@N-C</b>                                          | 0.20                           | N/A                           | 0.820                       | S4                |
| <b>Co-MOF@CNT</b>                                      | 0.21                           | 0.910                         | 0.820                       | S5                |
| <b>Ni<sub>x</sub>Co<sub>y</sub>O<sub>4</sub>/Co-NG</b> | 0.20                           | N/A                           | 0.804                       | S6                |
| <b>Cu-N/C</b>                                          | 0.25                           | 0.914                         | 0.813                       | S7                |
| <b>N-doped Fe/Fe<sub>3</sub>C@C</b>                    | 0.70                           | 0.910                         | 0.830                       | S8                |
| <b>LDH@ZIF-67-800</b>                                  | 0.20                           | 0.940                         | 0.830                       | S9                |
| <b>GNC-Co</b>                                          | 0.40                           | 0.840                         | 0.730                       | S10               |
| <b>ZIF8-Te-1000</b>                                    | 0.10                           | 0.881                         | 0.790                       | S11               |
| <b>CoO<sub>x</sub> NPs/BNG</b>                         | N/A                            | 0.950                         | 0.805                       | S12               |
| <b>CoMn/pNGr</b>                                       | 0.25                           | 0.940                         | 0.791                       | S13               |

**Table S5:** Comparison of the AEMFC performance for PVP-ZIF-8@CNT-900 with the other reported catalysts.

| Catalyst                   | Loading (mg cm <sup>-2</sup> ) | Membrane             | Temperature (°C) | P <sub>max</sub> (mW cm <sup>2</sup> ) | References        |
|----------------------------|--------------------------------|----------------------|------------------|----------------------------------------|-------------------|
| <b>PVP-ZIF-8@CNT-900</b>   | <b>2.0</b>                     | <b>Fuma-Tech FAA</b> | <b>60</b>        | <b>45</b>                              | <b>This study</b> |
| <b>40 wt% Ag/CNT</b>       | 0.5                            | Fuma-Tech FAA        | RT               | 26.1                                   | S14               |
| <b>CoFeN<sub>x</sub>/C</b> | 2.5                            | Tokuyama A-201       | 60               | 37                                     | S15               |
| <b>Fe/Co-NpGr</b>          | 2.5                            | Fuma-Tech FAA        | 50               | 35                                     | S16               |
| <b>N-S/Gr- 1000</b>        | 2.0                            | Fumapem FAA          | RT               | 19.8                                   | S17               |
| <b>FeNCNH</b>              | 4.0                            | Fumapem FAA          | 50               | 35                                     | S18               |
| <b>N-S-MPC</b>             | 3.0                            | Tokuyama A-201       | RT               | 21.7                                   | S19               |
| <b>CoPC/C</b>              | 3.0                            | Tokuyama A-901       | RT               | 12.6                                   | S20               |

## References:

- S1. X. Li, Y. Fang, X. Lin, M. Tian, X. An, Y. Fu, R. Li, J. Jin and J. Ma, *J. Mater. Chem. A*, 2015, **3**, 17392-17402.
- S2. A. Aijaz, J. Masa, C. Rösler, W. Xia, P. Weide, A. J. R. Botz, R. A. Fischer, W. Schuhmann and M. Muhler, *Angew. Chem. Int. Ed.*, 2016, **55**, 4087-4091
- S3. S. Dou, L. Tao, J. Huo, S. Wang and L. Dai, *Energy Environ. Sci.*, 2016, **9**, 1320-1326.
- S4. M. Zhang, Q. Dai, H. Zheng, M. Chen and L. Dai, *Adv. Mater.*, 2018, **30**, 1705431.
- S5. Y. Fang, X. Li, F. Li, X. Lin, M. Tian, X. Long, X. An, Y. Fu, J. Jin, J. Ma, *J. Power Sources*, 2016, **326**, 50-59.
- S6. Y. Hao, Y. Xu, J. Liu and X. Sun, *J. Mater. Chem. A*, 2017, **5**, 5594-5600.
- S7. Q. Lai, J. Zhu, Y. Zhao, Y. Liang, J. He, J. Chen, *Small*, 2017, **13**, 1700740.
- S8. Y. Hou, T. Huang, Z. Wen, S. Mao, S. Cui, J. Chen, *Adv. Energy Mater.*, 2014, **4**, 1400337.
- S9. Z. Li, M. Shao, L. Zhou, R. Zhang, C. Zhang, M. Wei, D. G. Evans, X. Duan, *Adv. Mater.*, 2016, **28**, 2337-2344.
- S10. S. Li, D. Wu, C. Cheng, J. Wang, F. Zhang, Y. Su, X. Feng, *Angew. Chem. Int. Ed.*, 2013, **52**, 12105
- S11. W. Zhang, Z. -Y. Wu, H. -L. Jiang and S. -H. Yu, *J. Am. Chem. Soc.*, 2014, **136**, 14385-14388.
- S12. Y. Tong, P. Chen, T. Zhou, K. Xu, W. Chu, C. Wu and Y. Xie, *Angew. Chem. Int. Ed.*, 2017, **56**, 7121-7125.
- S13. S. K. Singh, V. Kashyap, N. Manna, S. N. Bhange, R. Soni, R. Boukherroub, S. Szunerits and S. Kurungot, *ACS Catal.*, 2017, **7**, 6700-6710.
- S14. A. Fazil and R. Chetty, *Electroanalysis*, 2014, **26**, 2380-2387.
- S15. R. Z. Jiang and D. Chu, *J. Power Sources*, 2014, **245**, 352-361.
- S16. T. Palaniselvam, V. Kashyap, S. N. Bhange, J. B. Baek and S. Kurungot, *Adv. Funct. Mater.*, 2016, **26**, 2150-2162.
- S17. A. Arunchander, S. G. Peera, S. K. Panda, S. Chellammal and A. K. Sahu, *Carbon*, 2017, **118**, 531-544.
- S18. S. M. Unni, S. Ramadas, R. Illathvalappil, S. N. Bhange and S. Kurungot, *J. Mater. Chem. A*, 2015, **3**, 4361-4367.

- S19. N. N. Xu, T. S. Zhu, J. L. Qiao, F. Y. Zhang and Z. W. Chen, *Int. J. Hydrog. Energy*, 2016, **41**, 9159-9166.
- S20. T. Zhu, X. Qing, P. Xu, Y. Song and J. Qiao, *ECS Transactions*, 2015, **66**, 105-110.
